# Supplementary material for: Patient safety vulnerabilities for children with intellectual disability in hospital: a systematic review and narrative synthesis
Source: PubMed Central journal article supplement — BMJ Paediatr Open. 2018 Jan 29;2(1):e000201. doi: 10.1136/bmjpo-2017-000201 (PMC5843001; doi:10.1136/bmjpo-2017-000201), 2018-01-29
Supplement: bmjpo-2017-000201supp001.pdf [file bmjpo-2017-000201supp001.pdf]

*Table 1: Included studies, with authors, country, methodology, participants, purpose of study, and main findings/themes*

| Authors/year                        | Country | Quantitative                                           | Qualitative                                                                | Participants                                                       | Purpose of study                                                                                                                 | Themes                                                                                                                                                                                                  |
|-------------------------------------|---------|--------------------------------------------------------|----------------------------------------------------------------------------|--------------------------------------------------------------------|----------------------------------------------------------------------------------------------------------------------------------|---------------------------------------------------------------------------------------------------------------------------------------------------------------------------------------------------------|
|                                     |         | methodology                                            | methodology                                                                |                                                                    |                                                                                                                                  |                                                                                                                                                                                                         |
| Aston, Breau and MacLeod; 2014 (32) | Canada  |                                                        | Feminist post-structuralist; semi-structured interviews; thematic analysis | 37 in total:<br>8 children with IDs;<br>17 parents;<br>12 nurses   | To better understand how children with intellectual disability, their parents and nurses experience care during hospitalisation. | <ul style="list-style-type: none"> <li>• Impact of HCW's assumptions on care quality.</li> <li>• Reliance on parental presence.</li> <li>• Importance of understanding the child and the ID.</li> </ul> |
| Atz et al; 2011 (20)                | USA     | Multicentre prospective and retrospective cohort study |                                                                            | 120 children;<br>96 with Down syndrome<br>24 without Down syndrome | Outcomes after specific cardiac surgery, comparing children with and without Down syndrome.                                      | <ul style="list-style-type: none"> <li>• Benefit of labels.</li> <li>• Importance of understanding the child and the ID.</li> </ul>                                                                     |

|                              |                |                                               |                                                                                                                               |                                                                                                  |                                                                                                                                                                                               |
|------------------------------|----------------|-----------------------------------------------|-------------------------------------------------------------------------------------------------------------------------------|--------------------------------------------------------------------------------------------------|-----------------------------------------------------------------------------------------------------------------------------------------------------------------------------------------------|
| Brown and Guvenir; 2008 (31) | United Kingdom | Semi-structured interviews; thematic analysis | 28 participants:<br>13 carers of children with learning disability<br>13 nursing staff<br>2 children with learning disability | Describe the experiences of children, their families and staff during hospitalisation.           | <ul style="list-style-type: none"> <li>• Reliance on parental presence.</li> <li>• Listening to parents.</li> <li>• Importance of understanding the child and the ID.</li> </ul>              |
| Croot; 2012 (35)             | United Kingdom | Constructivist; interview; thematic analysis  | 12 in total from 9 families:<br>11 parents; 1 grandparent                                                                     | Provide evidence of the care needs of Pakistani parents with a child with learning disabilities. | <ul style="list-style-type: none"> <li>• impact of HCW's assumptions on care quality.</li> <li>• Listening to parents.</li> <li>• Importance of understanding the child and the ID</li> </ul> |

|                              |                |                                                   |                                                                            |                                                                                                                      |                                                                                                                                                               |
|------------------------------|----------------|---------------------------------------------------|----------------------------------------------------------------------------|----------------------------------------------------------------------------------------------------------------------|---------------------------------------------------------------------------------------------------------------------------------------------------------------|
| Desai et al; 2014 (21)       | United Kingdom | Single centre;<br>Retrospective cohort study      | 107 children;<br>67 with Down Syndrome<br>40 without Down syndrome         | Determine if Down syndrome is a risk factor in the early postoperative period following specific cardiac surgery.    | <ul style="list-style-type: none"> <li>• Benefit of labels.</li> <li>• Importance of understanding the child and the ID.</li> </ul>                           |
| Fudge et al; 2010 (23)       | USA            | National database;<br>Retrospective cohort study. | 45 579 children;<br>4350 with Down syndrome<br>41229 without Down syndrome | Describe the postoperative morbidity and mortality rates for children with Down syndrome undergoing cardiac surgery. | <ul style="list-style-type: none"> <li>• Importance of understanding the child and the ID.</li> </ul>                                                         |
| Furukawa et al;<br>2013 (22) | Japan          | Single centre;<br>Retrospective cohort study      | 235 children;<br>8 with Down syndrome<br>227 without Down syndrome         | Evaluate mortality and postoperative outcomes after cardiac surgery in children with Down syndrome.                  | <ul style="list-style-type: none"> <li>• Impact of HCW's assumptions on care quality.</li> <li>• Importance of understanding the child and the ID.</li> </ul> |

|                            |       |                                                                     |                                                                                                                                                                |                                                                                                                                                                                                             |                                                                                                                                                                             |
|----------------------------|-------|---------------------------------------------------------------------|----------------------------------------------------------------------------------------------------------------------------------------------------------------|-------------------------------------------------------------------------------------------------------------------------------------------------------------------------------------------------------------|-----------------------------------------------------------------------------------------------------------------------------------------------------------------------------|
| Graham et al;<br>2009 (26) | USA   | Single centre;<br><br>Retrospective cohort<br><br>study             | 3437 anaesthetic events in<br><br>children;<br><br>479 had complex special<br><br>health care needs<br><br>2958 did not have special<br><br>health care needs. | To determine the utilization of<br><br>anaesthesia resources by children with<br><br>complex special health care needs.<br><br>Included children with developmental<br><br>disorders such as Down syndrome. | <ul style="list-style-type: none"> <li>• Impact of HCW's assumptions on care quality.</li> <li>• Reliance on parental presence.</li> <li>• Listening to parents.</li> </ul> |
| Gupta et al; 2014 (24)     | USA   | National database;<br><br>Retrospective cohort<br><br>study.        | 2815 children;<br><br>121 with Down syndrome<br><br>2694 without Down<br><br>syndrome.                                                                         | Evaluate morbidity and mortality<br><br>associated with ECMO in children with<br><br>Down syndrome and heart disease.                                                                                       | <ul style="list-style-type: none"> <li>• Impact of HCW's assumptions on care quality.</li> <li>• Importance of understanding the child and the ID.</li> </ul>               |
| Lal et al; 2013 (25)       | India | National database;<br><br>Retrospective case-<br><br>control study. | 64 children;<br><br>32 with Down syndrome;<br><br>32 matched controls.                                                                                         | Investigate outcomes from specified<br><br>cardiac surgery in children with Down<br><br>syndrome and compared to children<br><br>without Down syndrome.                                                     | <ul style="list-style-type: none"> <li>• Impact of HCW's assumptions on care quality.</li> </ul>                                                                            |

|                              |                   |                                                 |                                                                                                                                            |                                                                                                                                    |                                                                                                                                                               |
|------------------------------|-------------------|-------------------------------------------------|--------------------------------------------------------------------------------------------------------------------------------------------|------------------------------------------------------------------------------------------------------------------------------------|---------------------------------------------------------------------------------------------------------------------------------------------------------------|
| Malviya et al;<br>2001 (30)  | USA               | Single centre;<br>Retrospective cohort<br>study | Random sample of<br>children who had spinal<br>fusion<br><br>19 had cognitive<br>impairment<br><br>23 did not have cognitive<br>impairment | To compare pain assessment and<br>management practices in children with<br>and without cognitive impairment.                       | <ul style="list-style-type: none"> <li>• Impact of HCW's assumptions on care quality.</li> <li>• Importance of understanding the child and the ID.</li> </ul> |
| Morabito et al;<br>2006 (28) | United<br>Kingdom | Single centre;<br>Retrospective cohort<br>study | 173 children with<br>Hirschsprung's Disease;<br><br>17 with Down syndrome<br><br>156 without Down<br>syndrome                              | Compare the outcomes of surgery for<br>Hirschsprung's Disease in children with<br>Down syndrome to those without Down<br>syndrome. | <ul style="list-style-type: none"> <li>• Impact of HCW's assumptions on care quality.</li> <li>• Importance of understanding the child and the ID</li> </ul>  |

|                                                                |                 |                                           |                         |                                                                                                                                                                                 |                                                                                                                                                                                                       |                                                                                                                                                                                               |
|----------------------------------------------------------------|-----------------|-------------------------------------------|-------------------------|---------------------------------------------------------------------------------------------------------------------------------------------------------------------------------|-------------------------------------------------------------------------------------------------------------------------------------------------------------------------------------------------------|-----------------------------------------------------------------------------------------------------------------------------------------------------------------------------------------------|
| Pratt, Baird and Gringras; 2012 (33)                           | United Kingdom  | QI audit and evaluation                   | QI audit and interviews | <p>Experience of 52 children with neurodevelopmental problems;</p> <p>Pre change interviews: 20 staff and 4 families.</p> <p>Post change interviews: 20 staff<br/>8 parents</p> | <p>Evaluate the effectiveness of a quality improvement programme to improve the care experience during hospitalisation for children with learning difficulties, autism and challenging behaviour.</p> | <ul style="list-style-type: none"> <li>• Impact of HCW's assumptions on care quality.</li> <li>• Listening to parents.</li> <li>• Importance of understanding the child and the ID</li> </ul> |
| Travassos, van Herwaarden-Lindeboom and van der Zee; 2011 (29) | The Netherlands | Single centre; Retrospective cohort study |                         | <p>149 children with Hirschsprung's disease; 20 with Down syndrome; 129 without Down syndrome</p>                                                                               | <p>Compare the outcome of surgical treatment for Hirschsprung's disease in children with and without Down syndrome.</p>                                                                               | <ul style="list-style-type: none"> <li>• Impact of HCW's assumptions on care quality.</li> <li>• Importance of understanding the child and the ID</li> </ul>                                  |

|                                |                    |                                                 |                                                                                                            |                                                                                                                           |                                                                                                                                                              |
|--------------------------------|--------------------|-------------------------------------------------|------------------------------------------------------------------------------------------------------------|---------------------------------------------------------------------------------------------------------------------------|--------------------------------------------------------------------------------------------------------------------------------------------------------------|
| Valkenburg et al;<br>2011 (27) | The<br>Netherlands | Single centre;<br>Retrospective cohort<br>study | 45 neonates having same<br>surgical procedure<br>15 with Down syndrome;<br>30 without Down<br>syndrome.    | To compare postoperative analgesic pain<br>scores and management between<br>neonates with and without Down's<br>syndrome. | <ul style="list-style-type: none"> <li>• Impact of HCW's assumptions on care quality.</li> <li>• Importance of understanding the child and the ID</li> </ul> |
| Van Driest et al;<br>2013 (34) | USA                | Single centre;<br>Retrospective cohort<br>study | 121 children having<br>specific cardiac surgery;<br>44 with Down syndrome;<br>77 without Down<br>syndrome. | Compare opioid administration after<br>cardiac surgery in children with and<br>without Down syndrome.                     | <ul style="list-style-type: none"> <li>• Impact of HCW's assumptions on care quality.</li> <li>• Importance of understanding the child and the ID</li> </ul> |

---
